# Supplementary material for: An evaluation of phase angle, bioelectrical impedance vector analysis and impedance ratio for the assessment of disease status in children with nephrotic syndrome
Source: Springer Nature journal article supplement (doi:10.1186/s12882-019-1511-y), 2019-08-22
Supplement: MOESM1 [file 17093624]

**Figure S1:** Raw impedance data in the impedance plane.

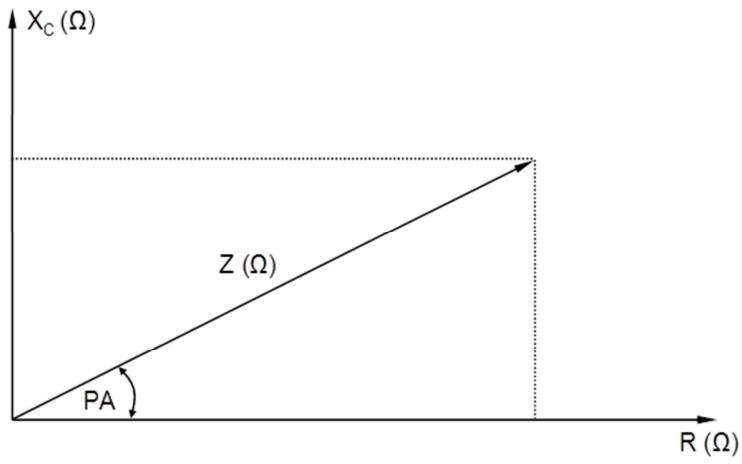

The relationship between capacitive reactance ( $X_C$ ), resistance ( $R$ ), impedance ( $Z$ ) in Ohms ( $\Omega$ ) and phase angle ( $PA$ ) in degrees.

**Figure S2:** Relationship between phase angle and participants' age and weight.

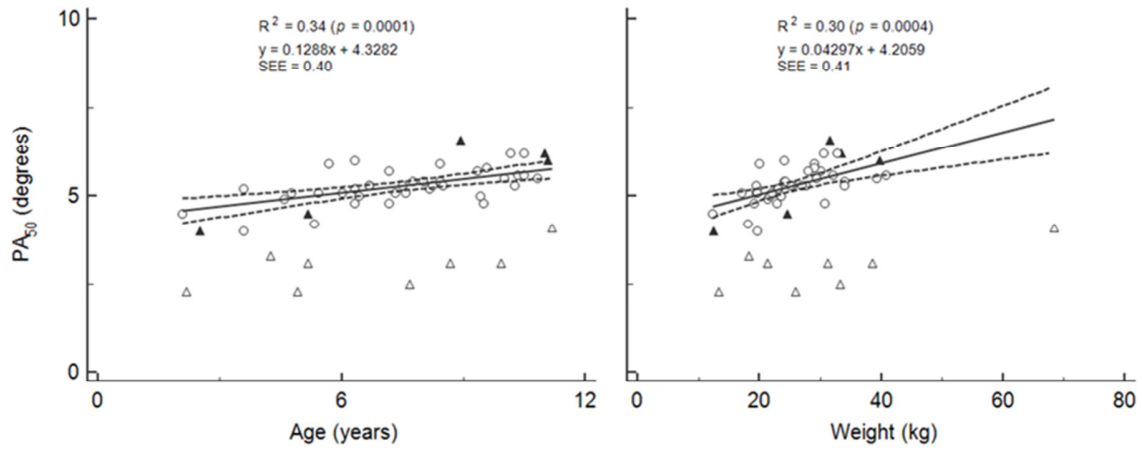

△: ANS, ▲: NSR, ○: HC; For group and impedance descriptions, see Table 1; Regression lines are based on the HC data.

**Table S1:** Characteristics of the study subjects.

| <b>Group /Parameter</b> | <b>Sex</b> | <b>Age (years)</b> | <b>Study weight (kg)</b> | <b>Height (cm)</b> | <b>BMI (kg/m<sup>2</sup>)</b> |
|-------------------------|------------|--------------------|--------------------------|--------------------|-------------------------------|
| ANS                     | 7 M: 1 F   | 6.7 ± 3.1          | 31.3 ± 17.1              | 120.7 ± 21.1       | 20.1 ± 4.6                    |
| ANS*                    | 4 M: 1 F   | 6.8 ± 3.1          | 28.5 ± 9.6               | 120.3 ± 21.8       | 19.1 ± 1.5                    |
| NSR                     | 4 M: 1 F   | 7.7 ± 3.8          | 28.3 ± 10.4              | 126.1 ± 26.2       | 17.3 ± 2.0                    |
| HC                      | 23 M: 15 F | 7.5 ± 2.2          | 25.3 ± 6.2               | 126.4 ± 14.2       | 15.6 ± 1.2                    |

Data are means ± SD; For group definitions (ANS, ANS\*, NSR, HC), see Table 1; BMI: body mass index.

**Table S2:** Clinical data for the ANS patients.

| Patients (No.)<br>/Parameters | Sex | BP<br>(mmHg) | HT <sup>†</sup><br>(yes/no) | Pulse<br>(bpm) | P-Albumin<br>(g/L) | P-sodium<br>(mmol/L) | P-potassium<br>(mmol/L) | P-creatinine<br>( $\mu$ mol/L) | eGFR <sup>‡</sup><br>(ml/min/1.73m <sup>2</sup> ) | B-Hgb<br>(mmol/L) |
|-------------------------------|-----|--------------|-----------------------------|----------------|--------------------|----------------------|-------------------------|--------------------------------|---------------------------------------------------|-------------------|
| Age: 1-4 years                |     |              |                             |                |                    |                      |                         |                                |                                                   |                   |
| 1*                            | M   | 110/70       | yes                         | 109            | 10                 | 139                  | 3.5                     | 18                             | 177                                               | 8.5               |
| 2                             | M   | 88/62        | no                          | 97             | 10                 | 141                  | 3.6                     | 30                             | 123                                               | 7.9               |
| 3*                            | M   | 109/68       | no                          | 92             | 9                  | 137                  | 5.5                     | 24                             | 167                                               | 8.1               |
| Age: 5-11 years               |     |              |                             |                |                    |                      |                         |                                |                                                   |                   |
| 4                             | M   | 109/71       | yes                         | 155            | 7                  | 131                  | 3.5                     | 21                             | 195                                               | 8.5               |
| 5*                            | F   | 130/93       | yes                         | 77             | 9                  | 132                  | 4.9                     | 71                             | 65                                                | 9.3               |
| 6*                            | M   | 116/77       | no                          | 104            | 9                  | 129                  | 5.0                     | 50                             | 94                                                | 9.4               |
| 7*                            | M   | 133/73       | yes                         | 99             | 9                  | 137                  | 3.8                     | 56                             | 94                                                | 8.7               |
| 8                             | M   | 109/56       | no                          | 102            | 4                  | 127                  | 3.9                     | 50                             | 108                                               | 10.6              |

\*Patients in the subgroup ANS\*, which were re-studied at remission, see Table 1.

BP: blood pressure; HT: hypertension; Hgb: Hemoglobin.

<sup>†</sup>Hypertension defined as blood pressure above the 95% percentile for high and gender.

<sup>‡</sup>eGFR estimated by the Schwartz formula<sup>1</sup>. Reference ranges: P-Albumin (37-48), P-Sodium (137-145), P-potassium (3.5-4.6), B hemoglobin (6.5-8.9).

<sup>1</sup> Schwartz GJ, Muñoz A, Schneider MF, Mak RH, Kaskel F, Warady BA, m.fl. New Equations to Estimate GFR in Children with CKD. J Am Soc Nephrol. 3. januar 2009;20(3):629–37.1).
